# Supplementary material for: Elevated CO2 not increased temperature has specific effects on soil nematode community either with planting of transgenic Bt rice or non-Bt rice
Source: PeerJ. 2020 Feb 12;8:e8547. doi: 10.7717/peerj.8547 (PMC7023840; doi:10.7717/peerj.8547)
Supplement: Data S1 [file peerj-08-8547-s001.xls]

## Sheet:  Community composition
		Family composition and structure of the dominant (>10%), common (≥1% and ≤10%) and rare (<1%) groups of nematode in transgenic Bt rice (cv. HH) and the parental line of non-Bt rice (cv. MH) under conditions of ambient CO2 concentration and high temperature (A+T), ambient CO2 concentration and normal temperature (A-T), elevated CO2 concentration and high temperature (E+T), elevated CO2 concentrati…
		Trophic levels	Genus		Jun. 2016								Oct.2016								Jun.2017								Aug. 2017								Oct.2017
					Transgenic Bt rice (cv. HH)				Parental line of non-Bt rice (cv. MH)				Transgenic Bt rice (cv. HH)				Parental line of non-Bt rice (cv. MH)				Transgenic Bt rice (cv. HH)				Parental line of non-Bt rice (cv. MH)				Transgenic Bt rice (cv. HH)				Parental line of non-Bt rice (cv. MH)				Transgenic Bt rice (cv. HH)				Parental line of non-Bt rice (cv.
																																									MH)
					A+T	A-T	E+T	E-T	A+T	A-T	E+T	E-T	A+T	A-T	E+T	E-T	A+T	A-T	E+T	E-T	A+T	A-T	E+T	E-T	A+T	A-T	E+T	E-T	A+T	A-T	E+T	E-T	A+T	A-T	E+T	E-T	A+T	A-T	E+T	E-T	A+T	A-T	E+T	E-T
		Herbivore	Beleodorus		—	—	—	—	—	*	—	—	**	*	*	*	*	—	—	—	*	**	*	**	**	*	**	**	*	*	*	—	*	*	**	*	*	*	—	**	*	**	*	*
			Filenchus		**	**	**	**	**	**	*	**	**	***	**	**	**	*	*	*	***	*	**	**	**	**	**	**	**	**	**	**	***	**	**	**	***	**	**	**	**	**	**	**
			Helicotylenchus		—	—	—	—	—	—	—	—	—	*	—	—	—	*	—	—	***	***	***	***	***	***	***	***	**	**	**	**	**	**	***	***	***	**	***	***	**	***	***	***
			Heterodera		—	—	—	—	—	—	—	—	—	—	—	*	—	—	—	—	—	—	—	—	—	—	—	—	—	—	—	—	—	—	—	—	—	—	—	—	—	—	—	—
			Hieschmanniella		—	—	—	—	—	—	—	—	—	—	—	—	—	—	—	—	—	—	—	—	—	*	—	*	—	—	—	—	—	—	—	—	—	—	—	—	—	—	—	—
			Pratylenchus		—	*	**	**	*	*	—	—	—	*	**	**	*	*	*	*	*	—	**	**	*	**	*	**	*	*	**	**	*	**	*	**	*	**	*	**	*	**	*	**
			Psilenchus		—	—	—	*	*	—	—	—	—	—	*	—	—	—	—	—	—	—	**	—	—	—	—	—	**	**	—	—	—	**	*	**	*	*	—	—	—	**	*	—
			Rotylenchus		**	*	**	—	*	*	**	—	**	**	***	**	**	**	*	**	*	—	*	*	**	**	*	*	*	*	**	—	*	**	**	**	*	**	—	—	—	*	**	—
			Tylenchorhynchus		**	*	*	—	*	—	—	—	**	**	*	*	**	**	**	*	—	—	—	—	**	*	—	—	—	—	**	*	—	**	*	*	—	—	—	—	—	—	—	—
			Tylenchus		—	—	—	—	—	—	—	—	—	—	—	—	—	—	—	—	*	*	—	—	—	—	—	*	—	—	*	*	*	*	—	—	—	—	*	*	—	*	*	*
		Bacterivore	Acrobeles		—	—	—	—	—	—	—	—	—	—	—	—	*	—	—	—	*	*	*	—	*	—	—	—	—	—	—	**	—	*	—	—	—	*	*	—	—	*	—	—
			Acrobeloides		***	***	***	***	***	***	***	***	***	***	***	***	***	***	***	***	**	***	**	**	***	***	***	**	**	**	**	**	**	**	**	**	**	**	***	***	***	*	**	**
			Alaimus		—	*	*	*	—	—	*	—	—	—	—	—	—	—	—	—	—	—	—	—	—	—	—	—	—	—	—	—	—	—	—	—	—	—	—	—	—	*	—	—
			Cephalobus		***	**	***	***	**	***	***	***	***	***	***	***	***	***	***	***	***	***	***	***	***	***	***	***	***	***	***	***	***	***	***	***	***	***	***	***	**	**	***	**
			Chiloplacus		**	**	**	**	**	**	**	**	**	**	**	**	**	**	**	**	**	**	**	**	**	**	**	**	**	**	**	**	**	**	**	**	**	*	**	*	**	*	**	**
			Diplogaster		—	—	—	*	—	—	—	—	—	—	—	—	—	—	—	—	—	—	—	—	—	—	—	—	—	—	—	—	—	—	—	—	—	*	—	—	—	—	—	—
			Diploscapter		***	***	**	**	**	***	***	**	**	**	**	**	**	**	**	**	**	*	**	*	**	*	**	*	***	***	**	***	**	**	**	**	—	***	**	—	*	**	—	**
			Eucephalobus		**	**	**	**	**	**	*	**	**	**	**	**	**	**	*	**	**	**	***	**	**	**	**	**	**	**	**	**	**	**	**	**	***	***	**	***	***	**	**	**
			Halicephalobus		—	—	—	—	—	—	—	—	—	—	—	—	—	—	—	—	—	—	—	—	—	—	—	—	—	**	—	—	**	—	—	—	—	—	*	—	—	*	—	—
			Mesorhabditis		*	**	*	—	**	**	**	**	**	**	**	***	*	***	*	**	**	**	*	**	*	**	*	**	**	**	*	—	—	*	*	**	**	**	***	—	**	***	—	—
			Metateratocephalus		—	—	—	—	—	—	—	—	—	—	—	—	—	—	—	—	*	—	*	—	*	*	*	—	—	—	*	—	—	—	—	—	—	—	—	—	—	—	*	—
			Panagrolaimus		—	**	—	*	—	**	—	**	—	—	—	**	—	—	—	*	—	—	—	**	—	—	*	—	—	—	*	*	**	—	*	**	**	**	—	—	***	***	*	*
			Plectus		—	—	—	—	—	—	—	—	—	—	—	—	—	—	—	—	—	—	—	—	—	—	*	—	—	—	*	—	—	—	—	*	—	—	—	*	**	**	*	**
			Prismatolaimus		—	—	*	*	—	—	—	*	**	**	**	**	**	**	**	**	*	—	**	*	—	*	—	—	*	**	—	**	**	**	**	**	**	**	**	**	**	**	**	**
			Protorhabditis		**	*	—	*	*	*	—	*	*	*	—	**	*	—	*	**	*	*	—	*	*	*	*	—	**	**	**	**	**	**	**	—	**	**	**	*	**	—	—	—
			Rhabditis		*	—	—	—	—	—	—	—	—	*	—	—	*	—	—	—	*	*	—	**	—	*	*	—	—	—	*	**	—	—	—	—	*	—	—	—	*	*	*	—
		Fungivore	Aphelenchoides		**	**	**	**	**	**	**	**	**	**	**	***	**	**	**	**	**	***	**	**	***	**	***	**	**	***	**	**	**	**	**	**	**	***	**	**	**	**	**	**
			Aphelenchus		**	**	**	**	**	**	**	**	*	*	—	*	*	**	*	*	**	**	**	**	**	**	**	**	*	*	*	—	**	**	*	—	**	*	**	**	**	*	*	**
			Nothotylenchus		**	**	**	**	**	**	*	**	*	*	—	*	—	*	—	—	—	—	—	—	—	—	—	—	—	—	—	—	—	—	—	—	—	—	—	—	—	—	—	—
			Seinura		—	—	—	—	—	—	—	—	—	—	—	—	—	—	—	—	*	**	*	**	—	*	—	—	—	**	**	*	—	*	**	*	**	**	**	**	**	**	**	**
			Tylencholaimus		*	—	—	*	—	—	—	—	**	**	**	*	*	*	—	—	—	—	**	—	*	—	*	*	—	—	*	—	—	*	*	—	—	—	—	—	—	—	**	—
		Omnivore-predator	Aporcelaimus		—	—	*	*	*	**	*	—	**	**	**	**	*	**	*	*	**	**	**	**	**	**	**	**	**	**	**	**	**	**	**	**	**	**	*	**	**	*	**	**
			Eudorylaimus		—	—	—	—	—	—	—	—	**	*	*	*	*	**	—	—	*	*	**	**	*	**	**	**	—	—	**	—	*	**	—	*	—	*	—	*	—	—	—	—
			Mononchus		—	—	—	—	—	—	—	—	**	—	—	—	—	—	—	—	—	—	—	—	—	—	—	—	—	—	—	—	—	—	—	—	—	—	—	—	—	—	—	—
		Note: * The abundance was <1% of the total nematode; ** The abundance was ≥1% and ≤10% of the total nematode; *** The abundance was >10% of the total nematode; — Not detected.

## Sheet: Fig. 3 Abundance
	Total nematode abundance (Ind. per 100 g dry soil)	HH	SE	MH	SE		HH	SE	MH	SE		HH	SE	MH	SE		HH	SE	MH	SE
Jun.2016	A+T	162.3	21.7	114.99	12.14	A-T	399.67	46.11	252.39	31.37	E+T	152.17	29.34	155.72	47.18	E-T	150.13	17.55	219.67	31.61
Oct.2016		323.52	42.61	616.11	54.52		251.07	53.8	519.56	28.65		201.11	66.52	653.89	81.06		345.78	36.95	330.41	22.35
Jun.2017		261.67	20.6	348.67	36.1		144.67	38.88	143.33	45.31		223	66.3	203.33	42.65		141	71.93	142	25.15
Aug.2017		178.33	42.9	225.33	52.88		85.33	44.87	232.33	50.22		204.67	42.59	161.33	24.21		321.67	42.93	204.33	36.12
Oct.2017		88.67	4.18	127.33	20.37		83.67	12.81	82.67	36.99		77	49.6	158.33	37.84		330.67	26.76	137.33	45.4
	Herbivores (%)	HH	SE	MH	SE		HH	SE	MH	SE		HH	SE	MH	SE		HH	SE	MH	SE
Jun.2016	A+T	6.06	2.71	5.49	1.11	A-T	2	0.5	3.71	1.22	E+T	12.89	2.46	2.92	1.064	E-T	5.68	0.98	3.23	2.43
Oct.2016		22.86	1.08	16.02	2.88		17.24	2.52	5.43	2.28		21.59	3.75	2.45	0.963		9.14	3.39	3.86	2.03
Jun.2017		39.71	3.3	19.74	4.92		12.23	4.53	24.17	2.06		20.37	1.42	34.03	4.74		31.71	4.81	44.74	3.23
Aug.2017		19.33	2.4	21.93	3.59		17.13	2.078	28.23	3.56		16.77	4	35.52	2.53		16.32	6.3	36.49	2.63
Oct.2017		40.5	3.36	14.88	1.29		14.38	3.9	24.31	1.97		18.81	3.86	36.94	2.34		47.08	4.26	45.72	2.45
	Bacterivores (%)	HH	SE	MH	SE		HH	SE	MH	SE		HH	SE	MH	SE		HH	SE	MH	SE
Jun.2016	A+T	81.12	5.21	79	3.55	A-T	92.59	2.1	87.05	2.99	E+T	60.66	5.39	73.98	5.47	E-T	63.93	4.06	71.1	2.39
Oct.2016		62.99	3.13	76.2	6.13		65.15	8.44	83.95	4.89		52.26	7.99	75.45	5.54		59.9	8.19	76.25	1.91
Jun.2017		42.7	7.96	48.64	7.55		57.5	6.8	54.83	12.07		43.61	5.67	25.4	3.67		33.79	4.24	19.21	6.5
Aug.2017		71.75	5.06	66.74	6.96		65.74	5.58	54.98	5.78		51.08	4.5	39.49	3.16		58.73	5.4	37.54	2.8
Oct.2017		45.06	4.1	70	6.69		63.49	6.33	67.63	9.18		58.48	6.91	26.76	3.39		29.22	8.81	21.42	5.86
	Fungivores (%)	HH	SE	MH	SE		HH	SE	MH	SE		HH	SE	MH	SE		HH	SE	MH	SE
Jun.2016	A+T	12.83	1.98	14.65	2.49	A-T	5.41	1.65	8.35	2.28	E+T	25.49	3.14	22.52	1.26	E-T	29.78	1.25	25.67	2.36
Oct.2016		9.26	2.98	6.31	1.05		11.49	1.48	6.16	1.71		23.91	1.25	21.93	2.66		26.92	1.99	19.29	0.89
Jun.2017		9.98	2.37	26.33	3.01		19.57	2.55	16.42	1.95		27.33	1.43	35.21	2.85		27.34	1.78	28.25	2.69
Aug.2017		7.39	1.02	9.99	2.56		15.41	2.09	9.85	1.08		24.12	3.83	23.61	2.16		22.99	2.21	21.53	1.37
Oct.2017		11.89	1.61	8.5	3.66		19.76	2.89	7.5	1.7		22.32	3.34	31.89	1.46		21.85	2.25	28.1	2.09
	Omnivore-predatores (%)	HH	SE	MH	SE		HH	SE	MH	SE		HH	SE	MH	SE		HH	SE	MH	SE
Jun.2016	A+T	0	0	0.87	0.48	A-T	0	0	0.88	0.51	E+T	0.96	0.58	0.58	0.58	E-T	0.61	0.31	0	0
Oct.2016		4.89	0.79	1.47	0.86		6.12	0.4956	4.46	0.71		2.24	0.251	0.17	0.17		4.04	0.8	0.61	0.51
Jun.2017		7.62	0.8	5.28	0.32		10.7	0.847	4.58	0.747		6.5	0.83	5.36	0.66		7.16	0.73	7.8	0.52
Aug.2017		1.52	0.51	1.34	0.69		1.72	1	6.94	0.525		8.03	1.1	1.38	0.41		1.96	0.394	4.44	0.7606
Oct.2017		2.55	1.29	6.62	0.9		2.37	0.39	0.57	0.29		0.38	0.38	4.41	0.83		1.85	0.65	4.76	0.39
												The effects of rice variety (transgenic Bt rice vs. its parental line of non-Bt rice), CO2 concentration (ambient CO2 concentration vs. elevated CO2 concentration), temperature (normal temperature vs. increased temperature), sampling time (Jun. and Oct. in 2016, and Jun. Aug. and Oct. in 2017) and their interactions on nematode abundance (F value).
												Variables	Abundance	Herbivores (%)	Bacterivores (%)	Fungivores (%)	Omnivores-predators (%)
												Variety (V)	3.3	0.13	1.22	0.73	0.46
												CO2 (C)	0.22	0.87	0.31	6.52 *	0.35
												Temperature (T)	0.01	0.32	0.17	0.51	0.16
												Sampling time (S)	16.12 ***	56.19 ***	23.27 ***	5.42 *	26.05 ***
												V × C	0.28	0.89	0.72	0.43	0.17
												V × T	2.4	2.51	0.65	2.97	0.65
												V × S	3.05	1.67	0.58	0.19	0.23
												C × T	0.09	1.73	0.64	0.36	0.55
												C × S	1.65	2.05	1.13	0.53	0.08
												T × S	0.21	0.04	0.22	1.65	0.16
												V × C × T	0.94	1.36	0.71	1.9	0.49
												V × C × S	1.25	2.11	3.2	0.86	0.68
												V × T × S	0.34	1.47	0.83	0.77	0.33
												C × T × S	2.6	2.04	1.09	0.84	1.97
												V × C × T × S	0.03	3.07	1.95	2.01	0.59
												Note: * P < 0.05; *** P < 0.001.

## Sheet: Fig.4 Ecological indices
		∑MI	HH	SE	MH	SE		HH	SE	MH	SE		HH	SE	MH	SE		HH	SE	MH	SE
	Jun.2016	A+T	1.89	0.09	1.97	0.02	A-T	1.24	0.09	1.51	0.1312	E+T	1.68	0.13	1.45	0.0721	E-T	1.5	0.09	1.6	0.13
	Oct.2016		2.32	0.11	2.13	0.06		2.12	0.07	1.74	0.12		1.93	0.1	1.15	0.09		2.09	0.13	1.52	0.07
	Jun.2017		2.43	0.12	2.27	0.02		2.12	0.07	2.19	0.04		1.95	0.11	2.12	0.107		2.09	0.16	1.99	0.131
	Aug.2017		1.97	0.06	2.01	0.01		2	0.07	2.24	0.04		2.04	0.13	2.01	0.09		1.93	0.12	2.15	0.1
	Oct.2017		2.16	0.07	2.16	0.106		2.19	0.15	2.12	0.1		1.74	0.08	2.09	0.15		1.7	0.08	1.97	0.13
		H'	HH	SE	MH	SE		HH	SE	MH	SE		HH	SE	MH	SE		HH	SE	MH	SE
	Jun.2016	A+T	1.55	0.06	1.43	0.08	A-T	1.24	0.09	1.51	0.05	E+T	1.68	0.05	1.45	0.11	E-T	1.5	0.09	1.5	0.02
	Oct.2016		2.09	0.09	1.77	0.041		2.12	0.07	1.74	0.12		1.93	0.1	1.15	0.16		2.09	0.05	1.52	0.12
	Jun.2017		2.04	0.02	2.2	0.08		2.12	0.07	2.19	0.04		1.95	0.08	2.12	0.11		2.09	0.09	1.99	0.11
	Aug.2017		2.01	0.04	1.89	0.09		2	0.07	2.24	0.04		2.04	0.13	2.01	0.09		1.93	0.03	2.15	0.08
	Oct.2017		1.92	0.1	1.94	0.06		2.19	0.15	2.12	0.1		1.74	0.08	2.09	0.13		1.7	0.07	1.97	0.1
		NCR	HH	SE	MH	SE		HH	SE	MH	SE		HH	SE	MH	SE		HH	SE	MH	SE
	Jun.2016	A+T	0.86	0.04	0.84	0.01	A-T	0.94	0.02	0.91	0.02	E+T	0.7041	0.03	0.7666	0.04	E-T	0.6822	0.014	0.7347	0.03
	Oct.2016		0.87	0.01	0.92	0.03		0.85	0.03	0.93	0.04		0.6861	0.02	0.7748	0.01		0.6899	0.025	0.7981	0.01
	Jun.2017		0.83	0.03	0.64	0.04		0.74	0.04	0.75	0.02		0.6147	0.03	0.4191	0.05		0.5528	0.03	0.4048	0.02
	Aug.2017		0.91	0.01	0.87	0.03		0.81	0.03	0.85	0.02		0.6793	0.05	0.6258	0.03		0.7187	0.04	0.6355	0.02
	Oct.2017		0.79	0.03	0.89	0.02		0.77	0.02	0.92	0.03		0.7238	0.026	0.4563	0.013		0.5722	0.04	0.4326	0.0242
		EI	HH	SE	MH	SE		HH	SE	MH	SE		HH	SE	MH	SE		HH	SE	MH	SE
	Jun.2016		54.31	2.89	63.45	4.06	A-T	55.33	4.07	62.25	3.9	E+T	43.42	3.21	44.43	4.1	E-T	32.23	4.13	36.33	2.51
	Oct.2016		65.11	2.57	49.91	2.72		58.52	3.08	60.91	2.85		35.87	3.77	36.86	3.03		41.67	3.18	39.31	2.82
	Jun.2017		76.71	4.77	69.32	3.34		72	3.85	71.49	4.61		54.29	3.59	50.87	5.12		43.57	4.43	46.07	2.92
	Aug.2017		47.01	2.93	36.05	3.3		46.9	4.96	50.1	3.86		32.13	3.04	32.07	2.01		27.57	2.88	33.79	4.38
	Oct.2017		74.27	4.79	70.95	4.6		76.71	4.54	77.16	5.39		42.82	2.72	41.88	3.22		55.81	2.48	52.58	2.16
		SI	HH	SE	MH	SE		HH	SE	MH	SE		HH	SE	MH	SE		HH	SE	MH	SE
	Jun.2016	A+T	70.46	1.86	70.75	2.38	A-T	76.78	1.87	74.82	1.47	E+T	67.56	2.63	68.48	3.18	E-T	61.62	1.85	65.05	2.89
	Oct.2016		70.46	1.84	71.11	2.95		81.32	5.07	78.92	3.93		77.21	2.09	81.4	2.47		73.35	3.73	74.42	3.37
	Jun.2017		81.76	1.35	80.52	2.36		88.75	1.32	84.42	2.09		81.82	1.36	80.7	1.51		87.6	1.65	85.63	2.24
	Aug.2017		64.21	1.57	65.23	2.72		74.01	2.63	76.2	2.15		68.54	2.24	68.71	1.49		69.33	2.94	73.62	3.32
	Oct.2017		75.97	1.92	77.43	1.71		71.63	4.11	68.84	0.85		69.25	3.55	71.87	3.92		69.87	4.38	68.46	3.47
											The effects of rice variety (transgenic Bt rice vs. its parental line of non-Bt rice), CO2 concentration (ambient CO2 concentration vs. elevated CO2 concentration), temperature (normal temperature vs. increased temperature), sampling time (Jun. and Oct. in 2016, and Jun. Aug. and Oct. in 2017) and their interactions on nematode ecological indices (F value).
											Variables	ΣMI	H'	NCR	EI	SI
											Variety (V)	0.15	1.99	0	0.23	0.58
											CO2 (C)	3.8	1.93	4.60 *	5.37 *	1.22
											Temperature (T)	1.32	0.45	0.003	1.44	1.05
											Sampling time (S)	29.57 ***	41.15 ***	17.68 ***	15.53 ***	26.71 ***
											V × C	0.21	0.46	0.64	0.43	0.24
											V × T	0.92	0.78	1.14	0.52	1.03
											V × S	3.1	9.25 **	4.30 *	1.68	0.45
											C × T	0.46	0	0.17	0.53	1.56
											C × S	4.04	0.01	0.02	0.62	2.62
											T × S	2.38	0.11	0.16	1.37	0.19
											V × C × T	0.01	0.01	0.21	1.99	0.58
											V × C × S	3.15	2.08	3.24	0.9	2.8
											V × T × S	0.43	0.57	0.29	0.35	0.36
											C × T × S	0.002	0.19	0.74	1.8	2.68
											V × C × T × S	0.24	0.11	0.47	0.48	1.97
											Note: ΣMI: total maturity index; H′: Shannon diversity; NCR: nematode channel ratio; EI: enrichment index; SI: structure index. Sampling time was assigned as repeated factor. * P < 0.05; ** P < 0.01; *** P < 0.001.

## Sheet: Table 1  ANOVA
Table 1 The effects of rice variety (transgenic Bt rice vs. its parental line of non-Bt rice), CO2 concentration (ambient CO2 concentration vs. elevated CO2 concentration), temperature (normal temperature vs. increased temperature), sampling time (Jun. and Oct. in 2016, and Jun. Aug. and Oct. in 2017) and their interactions on nematode abundance and ecological indices (F value).
Variables	Abundance						Ecological indices
	Total	Herbivores	Bacterivores	Fungivores	Omnivores-predators		ΣMI	H'	NCR	EI	SI
Variety (V)	3.3	0.13	1.22	0.73	0.46		0.15	1.99	0	0.23	0.58
CO2 (C)	0.22	0.87	0.31	6.52 *	0.35		3.8	1.93	4.60 *	5.37 *	1.22
Temperature (T)	0.01	0.32	0.17	0.51	0.16		1.32	0.45	0.003	1.44	1.05
Sampling time (S)	16.12 ***	56.19 ***	23.27 ***	5.42 *	26.05 ***		29.57 ***	41.15 ***	17.68 ***	15.53 ***	26.71 ***
V × C	0.28	0.89	0.72	0.43	0.17		0.21	0.46	0.64	0.43	0.24
V × T	2.4	2.51	0.65	2.97	0.65		0.92	0.78	1.14	0.52	1.03
V × S	3.05	1.67	0.58	0.19	0.23		3.1	9.25 **	4.30 *	1.68	0.45
C × T	0.09	1.73	0.64	0.36	0.55		0.46	0	0.17	0.53	1.56
C × S	1.65	2.05	1.13	0.53	0.08		4.04	0.01	0.02	0.62	2.62
T × S	0.21	0.04	0.22	1.65	0.16		2.38	0.11	0.16	1.37	0.19
V × C × T	0.94	1.36	0.71	1.9	0.49		0.01	0.01	0.21	1.99	0.58
V × C × S	1.25	2.11	3.2	0.86	0.68		3.15	2.08	3.24	0.9	2.8
V × T × S	0.34	1.47	0.83	0.77	0.33		0.43	0.57	0.29	0.35	0.36
C × T × S	2.6	2.04	1.09	0.84	1.97		0.002	0.19	0.74	1.8	2.68
V × C × T × S	0.03	3.07	1.95	2.01	0.59		0.24	0.11	0.47	0.48	1.97
Note: ΣMI: total maturity index; H′: Shannon diversity; NCR: nematode channel ratio; EI: enrichment index; SI: structure index. Sampling time was assigned as repeated factor. * P < 0.05; ** P < 0.01; *** P < 0.001.

## Sheet: Fig.5 Nematode faunal analysis
	SI	B-6/16	B-10/16	NB-6/16	NB-10/16	EI	B-6/16	B-10/16	NB-6/16	NB-10/16
	A+T	73.39	74.02	70.46	76.81		48.91	65.07	56.11	51.98
	2016年	71	69.49	75	66.93		58.79	60.67	64.11	44.52
		67	67.86	66.78	69.58		55.23	69.58	70.13	53.24
	SI	B-6/16	B-10/16	NB-6/16	NB-10/16	EI	B-6/16	B-10/16	NB-6/16	NB-10/16
	A-T	74	84	76.93	71.59		54.96	63.91	56.7	65.65
		80.35	88.45	72	80.16		48.46	53.26	60.28	55.81
		76	71.52	75.53	85.02		62.56	58.4	69.78	61.27
	SI	B-6/16	B-10/16	NB-6/16	NB-10/16	EI	B-6/16	B-10/16	NB-6/16	NB-10/16
	E+T	69.74	73.83	63	85.35		48.31	37.86	50.78	30.95
		70.61	81.02	68.44	82		37.37	41.18	45.73	38.63
		62.32	76.77	74	76.85		44.58	28.58	36.77	41
	SI	B-6/16	B-10/16	NB-6/16	NB-10/16	EI	B-6/16	B-10/16	NB-6/16	NB-10/16
	E-T	65.21	75.96	65.15	68.26		26.68	35.66	32.03	34.53
		59.05	78.1	70	75.14		29.71	42.86	40.74	44.3
		60.6	65.99	60	79.85		40.29	46.5	36.22	39.1
	SI	B-6/17	B-8/17	B-10/17	NB-6/17	NB-8/17	NB-10/17	EI	B-6/17	B-8/17	B-10/17	NB-6/17	NB-8/17	NB-10/17
	A+T	79.61	61.67	79.56	77.01	70.28	80.57		85.88	45.98	73.85	69.09	35.39	63.8
	2017年	81.44	67.07	73	79.56	64.47	77.05		69.88	42.53	82.77	63.65	30.7	79.55
		84.24	63.9	75.34	85	60.95	74.67		74.36	52.51	66.18	75.23	42.06	69.49
	SI	B-6/17	B-8/17	B-10/17	NB-6/17	NB-8/17	NB-10/17	EI	B-6/17	B-8/17	B-10/17	NB-6/17	NB-8/17	NB-10/17
	A-T	86.72	72	73.21	87.26	76.06	69.34		74.56	54.79	73.98	63.55	56.06	75.72
		91.24	79.23	63.85	85.66	72.55	70		77.01	48.18	85.57	79.51	42.86	87.14
		88.3	70.8	77.82	80.35	80	67.17		64.43	37.74	70.58	71.4	51.38	68.62
	SI	B-6/17	B-8/17	B-10/17	NB-6/17	NB-8/17	NB-10/17	EI	B-6/17	B-8/17	B-10/17	NB-6/17	NB-8/17	NB-10/17
	E+T	79.76	72.48	62.76	78.03	69.31	72.76		59	29.73	42.56	49.45	29.05	36.53
		84.39	64.71	70	80.81	70.95	64.68		46.71	28.49	38.24	42.8	31.27	47.65
		81.3	68.44	75	83.26	65.88	78.17		51.15	38.18	47.65	60.36	35.88	41.45
	SI	B-6/17	B-8/17	B-10/17	NB-6/17	NB-8/17	NB-10/17	EI	B-6/17	B-8/17	B-10/17	NB-6/17	NB-8/17	NB-10/17
	E-T	87.39	74.81	61.73	82.11	79.63	66.49		37.54	33.18	59.43	40.31	28.45	56.36
		84.84	64.74	76.76	85	68.19	75.22		40.97	23.67	56.94	48.14	42.48	52.5
		90.56	68.45	71.12	89.78	73.03	63.68		52.2	25.86	51.05	49.75	30.45	48.87
